# Supplementary material for: Phase separation of insulin receptor substrate 1 drives the formation of insulin/IGF-1 signalosomes
Source: PubMed Central journal article supplement (PMC9240053; doi:10.1038/s41421-022-00426-x), 2022-06-28
Supplement: 41421_2022_426_MOESM1_ESM.pdf [file 41421_2022_426_MOESM1_ESM.pdf]

## Supplemental Figures and Legends

Sup. Fig. 1

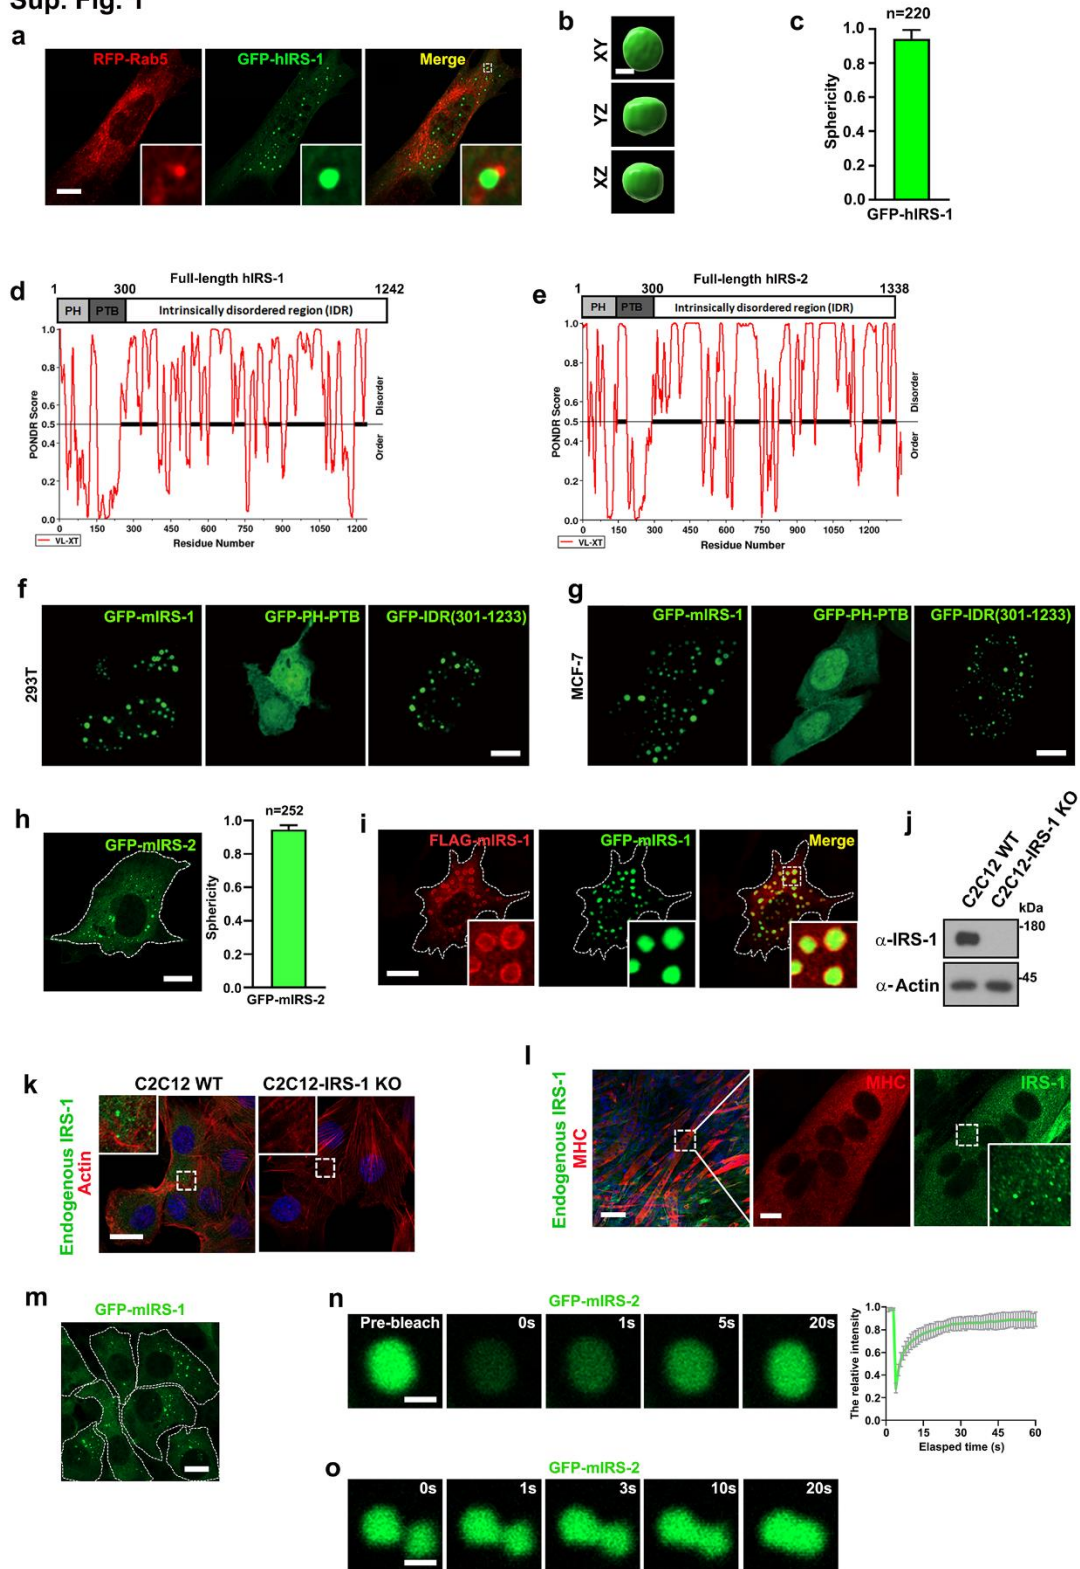

**Fig S1. Phase separation of IRS-1 mediated by its C-terminus.** **a** Confocal images of representative C2C12 myoblasts co-expressing RFP-Rab5 and GFP-hIRS-1. Scale

bar, 10  $\mu\text{m}$ . **b** Rendered 3D shapes of an hIRS-1 droplet. The panels show the XY, XZ, and YZ planes. Scale bar, 1  $\mu\text{m}$ . **c** A plot showing the sphericity of hIRS-1 droplets (n=220). Data are shown as mean  $\pm$  SEM. **d** Protein sequence and disorder prediction (PONDR) of the hIRS-1 [1242 amino acids (aa)]. **e** Protein sequence and disorder prediction (PONDR) of the hIRS-2 [1338 amino acids (aa)]. **f** Representative images of mIRS-1 droplets in 293T cells expressing either GFP-tagged mIRS-1, the PH-PTB region (1-300 amino acids), or mIRS-1 IDR (301-1233 amino acids). Scale bar, 10  $\mu\text{m}$ . **g** Representative images of mIRS-1 droplets in MCF-7 cells expressing either GFP-tagged mIRS-1, the PH-PTB region (1-300 amino acids), or mIRS-1 IDR (301-1233 amino acids). Scale bar, 10  $\mu\text{m}$ . **h** Representative images of GFP-mIRS-2 droplets in C2C12 cells. Scale bar, 10  $\mu\text{m}$ . A plot showing the sphericity of GFP-mIRS-2 droplets (n=252). Data are shown as mean  $\pm$  SEM. **i** Representative confocal images of C2C12 myoblasts co-expressing GFP-tagged mIRS-1 and FLAG-tagged-mIRS-1. Scale bar, 10  $\mu\text{m}$ . **j** Immunoblot analysis of endogenous IRS-1 expression levels in C2C12 wildtype and C2C12-IRS-1 KO cell lines. **k** Confocal images of endogenous IRS-1 in C2C12 wildtype and C2C12-IRS-1 KO cell lines. Scale bar, 20  $\mu\text{m}$ . **l** Confocal images of endogenous IRS-1 in differentiated C2C12 myotubes. Scale bar, 100  $\mu\text{m}$ . the inset scale bar, 10  $\mu\text{m}$ . **m** Similar expression levels of GFP-mIRS-1 in DOX-induced C2C12-IRS-1 KO/GFP-mIRS-1 cells. Scale bar, 10  $\mu\text{m}$ . **n** Confocal images and quantification of GFP-mIRS-2 fluorescence recovery after photobleaching (n=14). Scale bar, 1  $\mu\text{m}$ . **o** Time-lapse imaging showing fusion of two GFP-mIRS-2 droplets in cells. Scale bar, 1  $\mu\text{m}$ .

Sup. Fig. 2

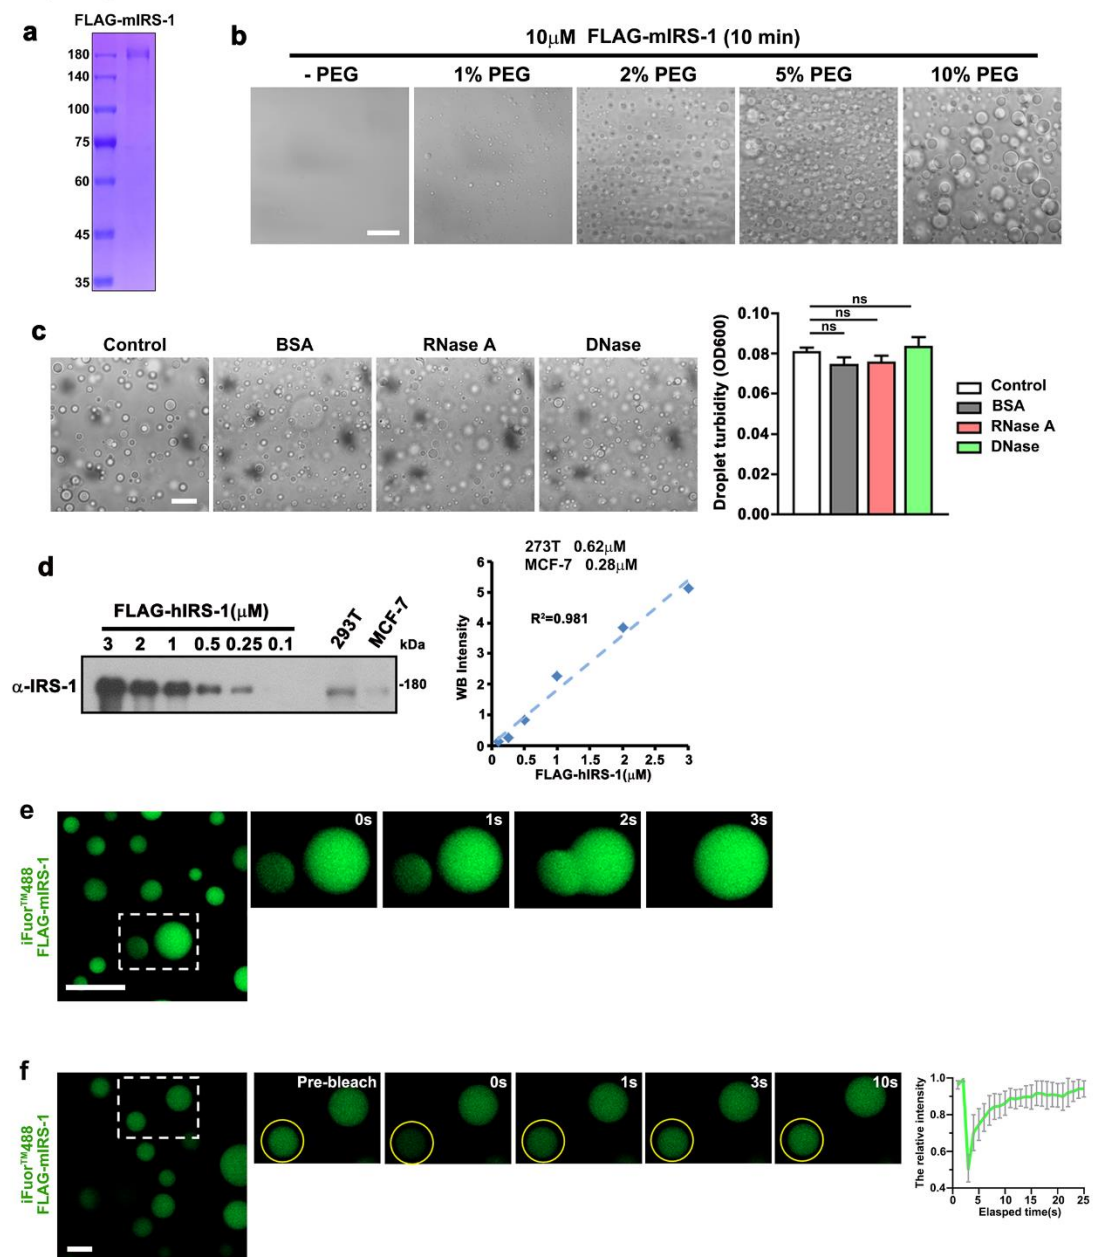

**Fig S2. Crowding reagent enhances the phase separation of IRS-1.** **a** SDS-PAGE and Coomassie blue staining results of purified recombinant FLAG-mIRS-1 protein. **b** DIC images of FLAG-mIRS-1 (10 $\mu$ M) LLPS at a series of PEG-8000 concentration (1-10%). The proteins were incubated with phase separation buffer at room temperature for 10 min. **c** The proteins (1 $\mu$ M) were treated with indicated reagents for 1 hour at

room temperature. The quantification result is shown as mean  $\pm$  SD. ns: not significant.

**d** Quantification result of endogenous IRS-1 protein concentration in 293T and MCF7 cells based on immunoblot densitometry analysis performed on cell lysates and purified FLAG-hIRS-1 protein. **e** Time-lapse imaging showing fusion of two iFluor™ 488-FLAG-mIRS-1 droplets in buffer at room temperature. Scale bar, 10  $\mu$ m. **f** Confocal images and quantification of iFluor™ 488-FLAG-mIRS-1 fluorescence recovery after photobleaching (n=11). Data are shown as mean  $\pm$  SD. Scale bar, 10  $\mu$ m.

### Sup. Fig. 3

**a**

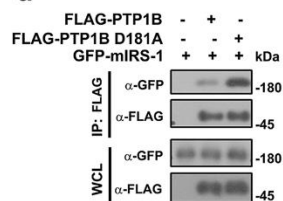

**b**

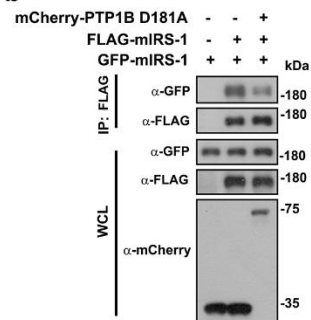

**c**

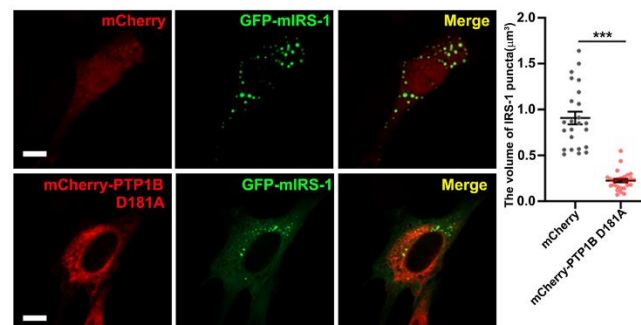

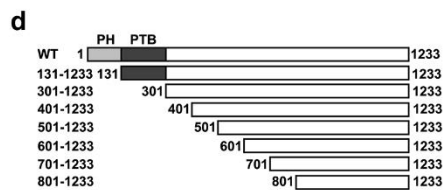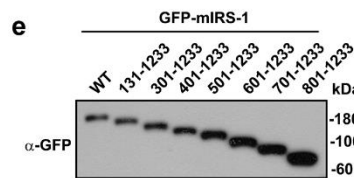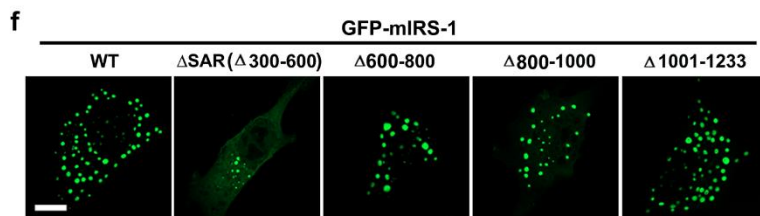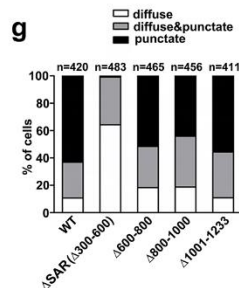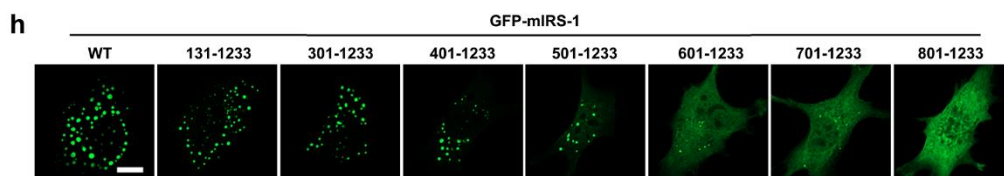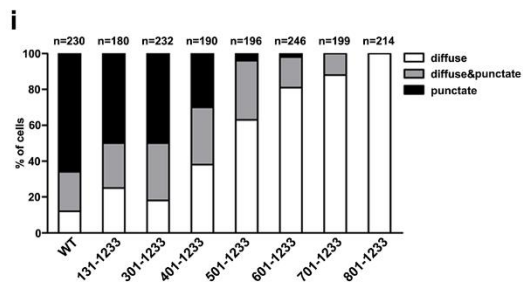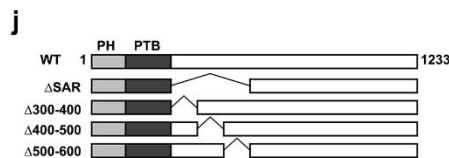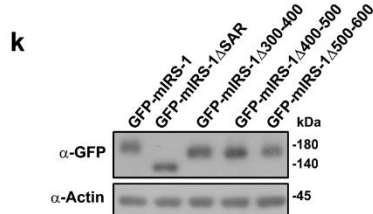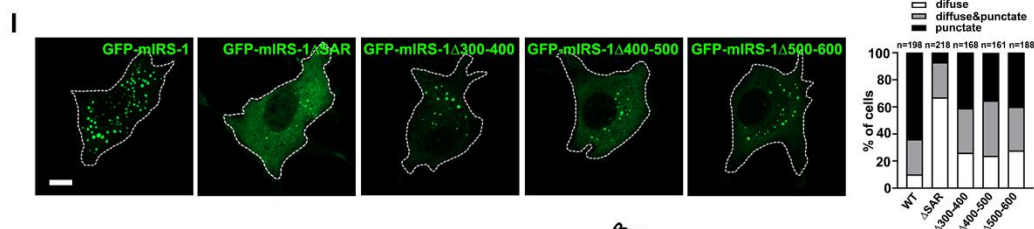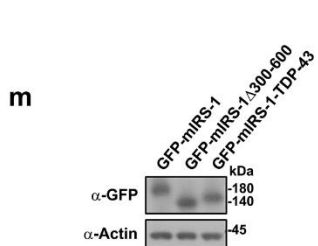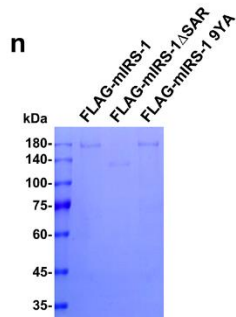

**Fig S3. The 300-600 region of mIRS-1 is essential for phase separation.**

**a** FLAG-tagged PTP1B wildtype or D181A mutant construct was co-transfected with GFP-mIRS-1 into 293T cells for immunoprecipitation analysis. **b** mCherry-tagged PTP1B D181A mutant was co-transfected with FLAG-tagged and GFP-tagged mIRS-1 into 293T cells for immunoprecipitation analysis. **c** Confocal images of representative C2C12 myoblasts co-expressing GFP-mIRS-1 and mCherry vector or mCherry-PTP1B D181A mutant. The volume of GFP-mIRS-1 puncta was quantified (n=26). Data in the graphs represent the mean  $\pm$  SEM. \*\*\*:  $p < 0.001$ . Scale bar, 10  $\mu$ m. **d** Schematic diagram of mIRS-1 and its truncation mutants. **e** GFP-tagged mIRS-1 mutant constructs as shown in **d** were expressed in 293T cells. **f** Confocal images of representative C2C12 myoblasts expressing GFP-tagged mIRS-1 mutants as shown in **Fig. 3c**. Scale bar, 10  $\mu$ m. **g** Quantitative analysis of phase separation of GFP-tagged mIRS-1 mutants as shown in **f** (classed as predominantly diffuse, diffuse plus punctate, or predominantly punctate). **h** Confocal images of representative C2C12 myoblasts expressing GFP-tagged mIRS-1 mutants as shown in **d**. Scale bar, 10  $\mu$ m. **i** Quantitative analysis of phase separation of GFP-tagged mIRS-1 mutants as shown in **h** (classed as predominantly diffuse, diffuse plus punctate, or predominantly punctate). **j** Schematic diagram of mIRS-1 and its deletion mutants. **k** Immunoblot analysis of expression levels of the indicated GFP-tagged mutant proteins as shown in **j**. **l** Confocal images of representative C2C12 myoblasts expressing GFP-tagged mIRS-1 mutants as shown in **j**. Scale bar, 10  $\mu$ m. **m** Immunoblot analysis of GFP-tagged mIRS-1 and mutants expression levels in Fig. 3f. **n** SDS-PAGE and Coomassie blue staining results of

purified recombinant FLAG-mIRS-1 wildtype and mutant proteins.

Sup. Fig. 4

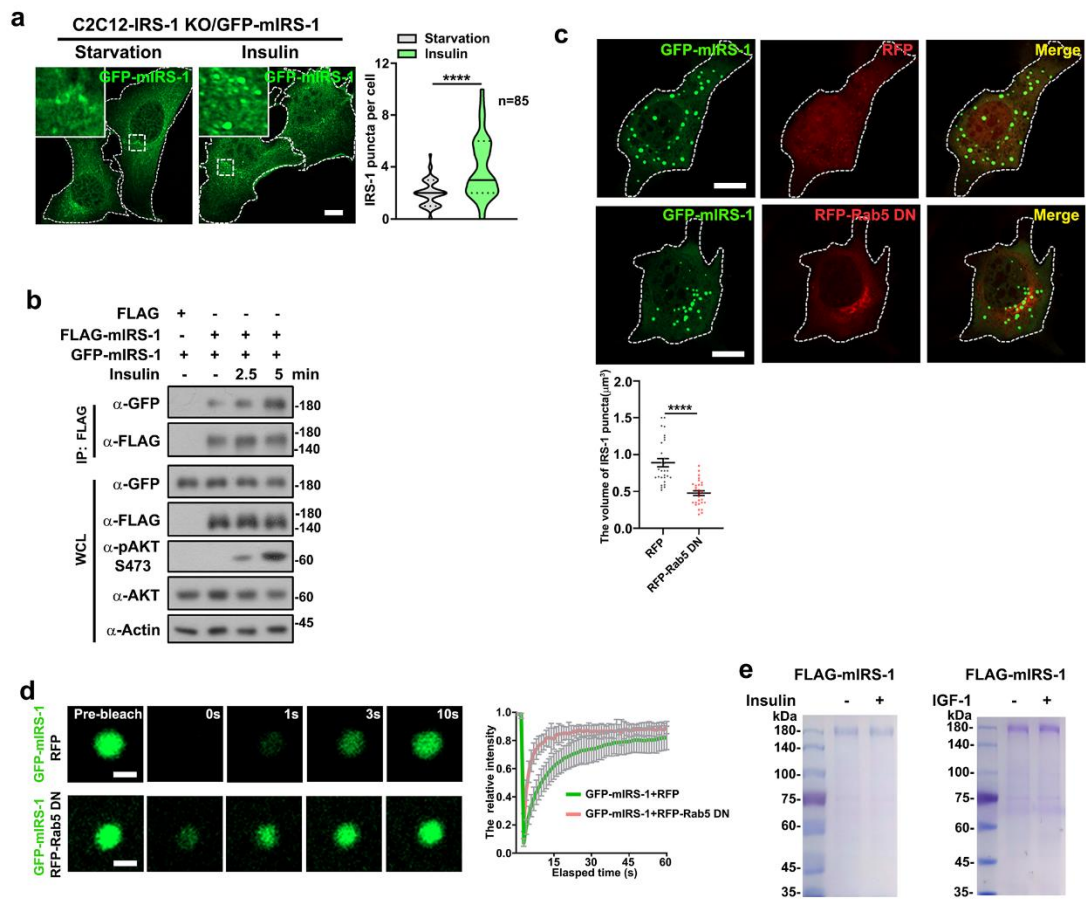

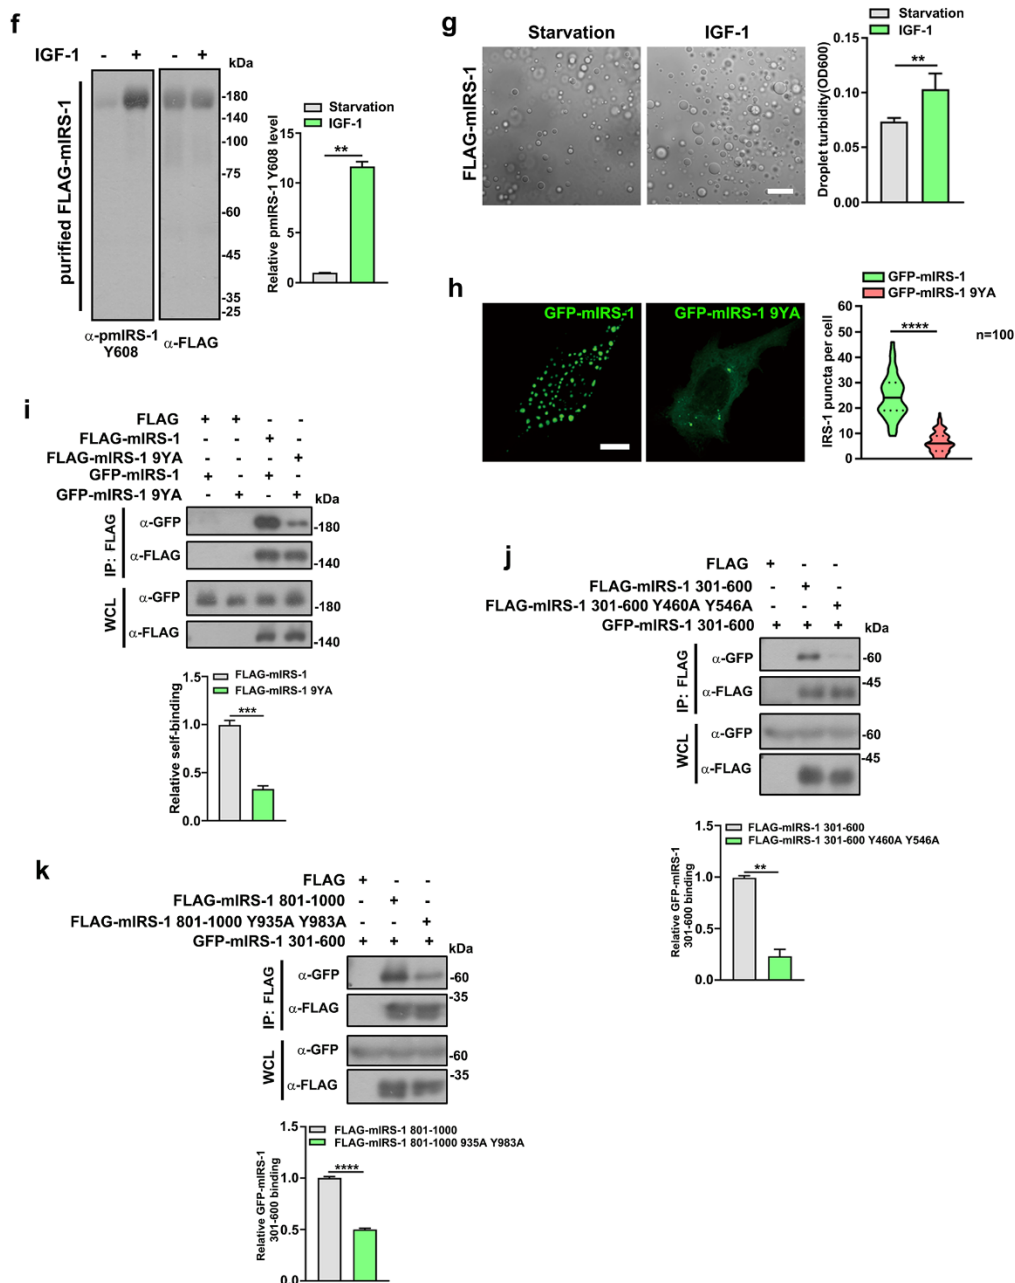

**Fig. S4 Insulin/IGF-1 stimulation promotes the phase separation of IRS-1.**

**a** Confocal image of GFP-mIRS-1 foci in C2C12-IRS-1 KO/GFP-mIRS-1 cells treated with control or with insulin-conditioned (100nM) medium for 2.5 min. Scale bar, 10  $\mu$ m. Quantitative analysis of the number of mIRS-1 puncta with data shown as a violin plot. \*\*\*\*:  $p < 0.0001$ . **b** FLAG-tagged and GFP-tagged mIRS-1 were co-transfected into 293T cells. Cells were serum starved for 16 hours followed by insulin stimulation



and coimmunoprecipitation analysis. **c** Confocal images of representative C2C12 myoblasts co-expressing GFP-mIRS-1 and RFP vector or RFP-Rab5 DN mutant. Scale bar, 10  $\mu$ m. The puncta volume was quantified (n=30). \*\*\*\*: p<0.0001. **d** Confocal images and quantification of GFP-mIRS-1 fluorescence recovery after photobleaching (n=15). Data are shown as mean  $\pm$  SD. Scale bar, 1  $\mu$ m. **e** SDS-PAGE and Coomassie blue staining results of FLAG-mIRS-1 proteins purified from insulin- or IGF-1-stimulated cells. **f** Immunoblot analysis of Y608 tyrosine phosphorylation of FLAG-mIRS-1 purified from starved or IGF-1-stimulated (15min) 293T cells. The quantification result is shown as mean  $\pm$  SEM. \*\*: p<0.01. **g** DIC images of FLAG-mIRS-1 purified from starved or IGF-1-stimulated (15min) 293T cells. The proteins (1 $\mu$ M) were incubated with phase separation buffer at room temperature for 20 min. Scale bar, 20  $\mu$ m. The quantification result is shown as mean  $\pm$  SD. \*\*: p<0.01. **h** Confocal images of representative C2C12 cells expressing either GFP-tagged mIRS-1 or GFP-mIRS-1 9YA mutant. Scale bar, 10  $\mu$ m. The quantification result is also shown as violin plot. \*\*\*\*: p<0.0001. **i** FLAG-tagged and GFP-tagged mIRS-1 or mIRS-1 9YA mutant were co-transfected into 293T cells for immunoprecipitation analysis. **j** FLAG-tagged 301-600 or 301-600 Y460A Y546A mutant were co-transfected with GFP-tagged 301-600 into 293T cells for immunoprecipitation analysis. **k** FLAG-tagged 801-1000 or 801-1000 Y935A Y983A mutant were co-transfected with GFP-301-600 into 293T cells for immunoprecipitation analysis. Data in the bar graphs represent the mean  $\pm$  SEM values of the ratios of densities for three independent experiments in i, j and k. \*\*: p<0.01. \*\*\*: p<0.001. \*\*\*\*: p<0.0001.

Sup. Fig. 5

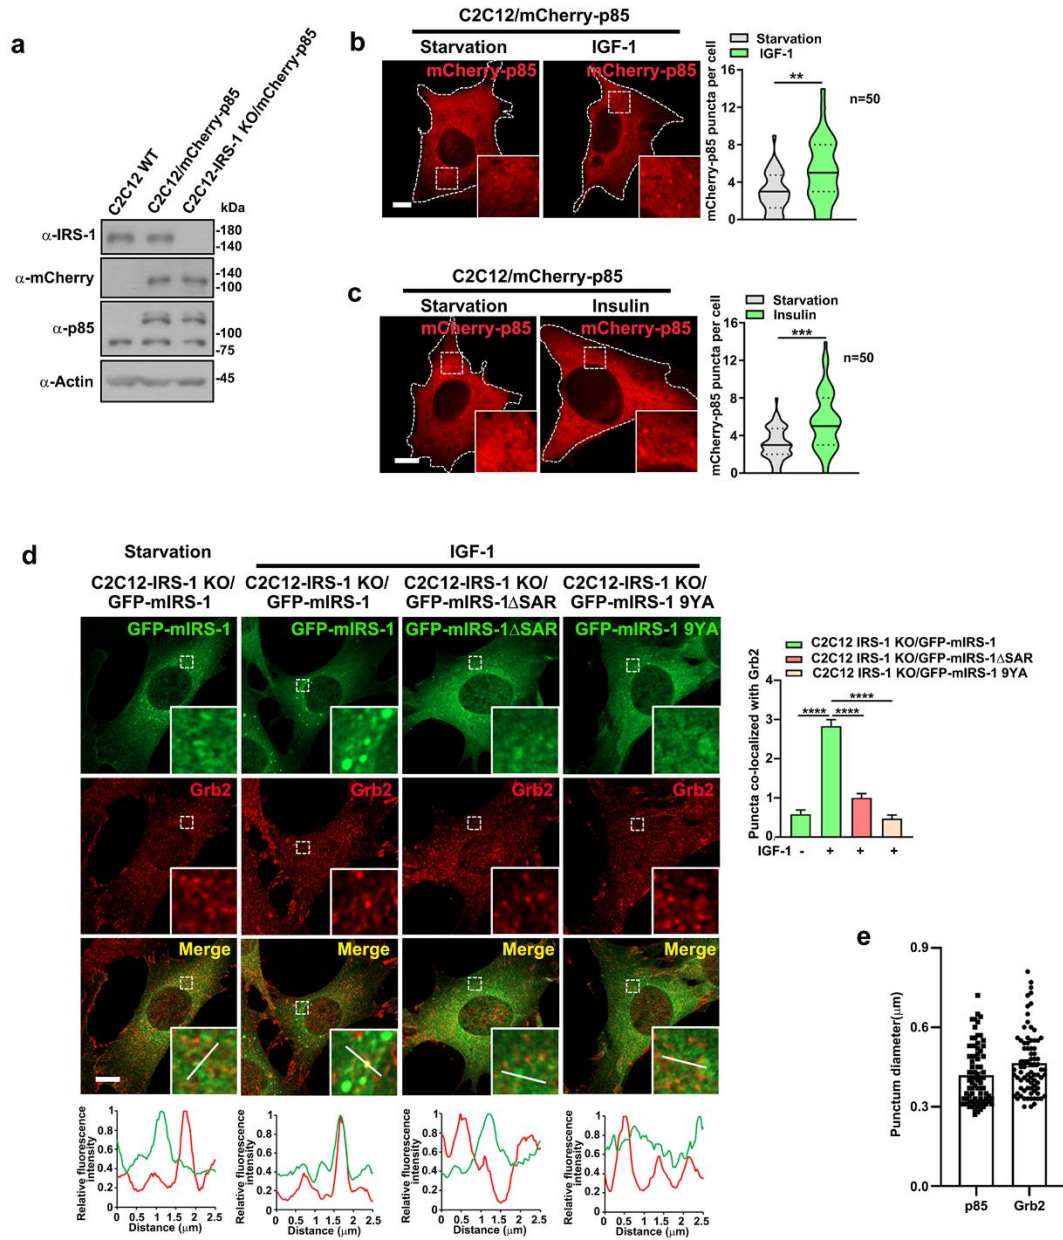

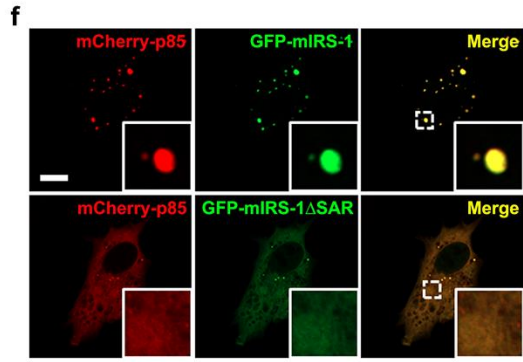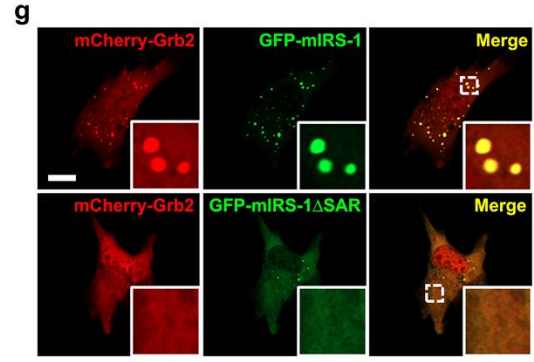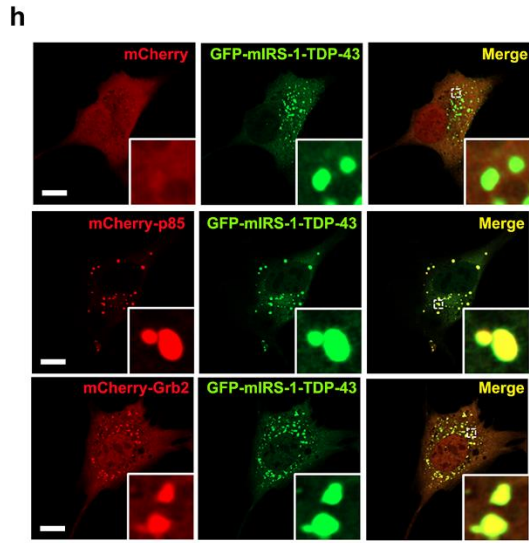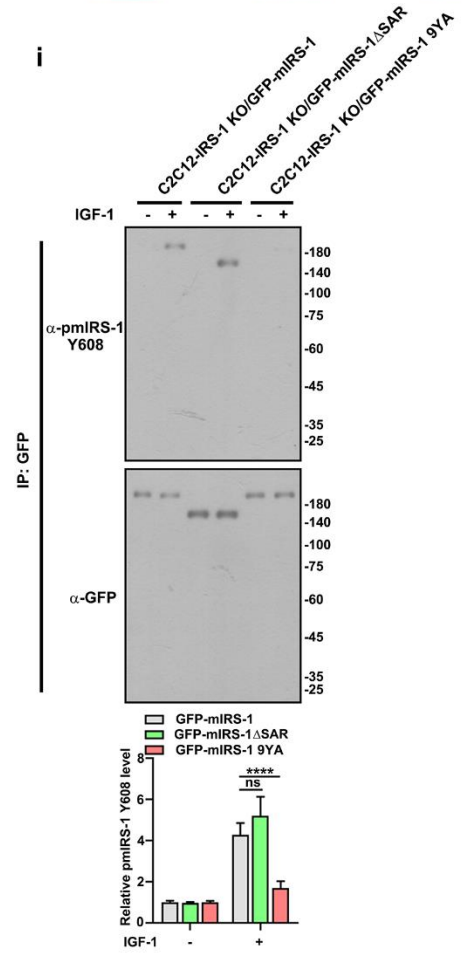

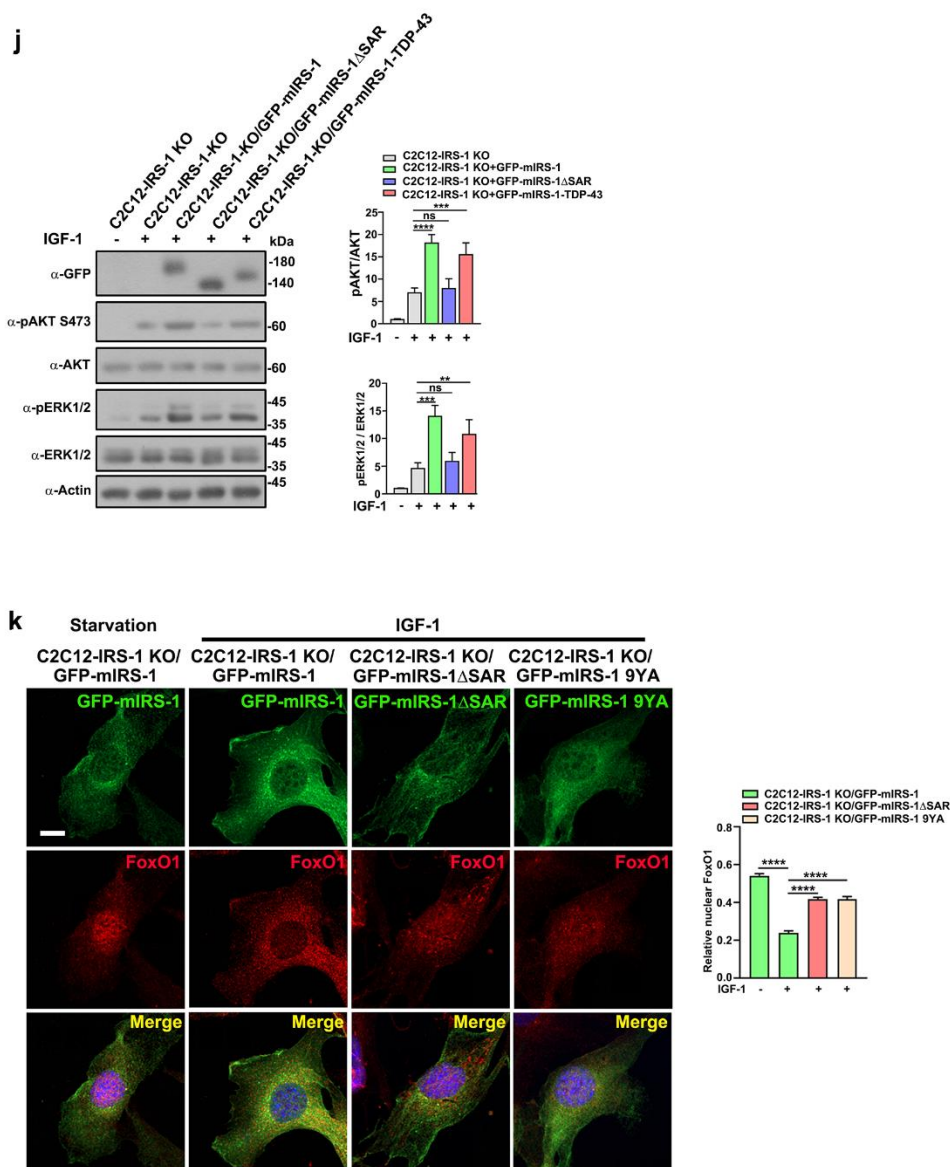

**Fig. S5. IRS-1 recruits downstream effectors to form insulin/IGF-1 signalosomes.**

**a** Immunoblot analysis of IRS-1 expression levels in C2C12 wildtype, C2C12/mCherry-p85 and C2C12-IRS-1 KO/mCherry-p85 cell lines. **b** Confocal image of mCherry-p85 foci in C2C12/mCherry-p85 cells treated with control or with IGF-1-conditioned (100 ng/ml) medium for 2.5 min. Scale bar, 10  $\mu$ m. Quantitative analysis of number of mCherry-p85 puncta with results shown as violin plot. \*\*:  $p < 0.01$ . **c** Confocal image of mCherry-p85 foci in C2C12/mCherry-p85 cells treated with control

or with insulin-conditioned (100nM) medium for 2.5 min. Scale bar, 10  $\mu$ m. Quantitative analysis of number of mCherry-p85 puncta is shown with the quantification result shown as violin plot. \*\*\*:  $p < 0.001$ . **d** Confocal images of endogenous Grb2 and GFP-mIRS-1 or mutants in the indicated cell lines. Scale bar, 10  $\mu$ m. Line scan shows the related intensity profiles of mIRS-1 with Grb2. The puncta co-localized with Grb2 were quantified (n=36). Data in the bar graphs represent the mean  $\pm$  SEM. \*\*\*\*:  $p < 0.0001$ . **e** The puncta diameter of GFP-mIRS-1 colocalized with endogenous p85 or Grb2 in **d** and **Fig. 5c** was quantified (n=80). Data in the bar graphs represent the mean  $\pm$  SEM. **f** Confocal images of representative C2C12 cells co-expressing mCherry-p85 (red) and GFP-mIRS-1 or GFP-mIRS-1  $\Delta$ SAR mutant (green). Scale bar, 10  $\mu$ m. **g** Confocal images of representative C2C12 cells co-expressing mCherry-Grb2 (red) and GFP-mIRS-1 or GFP-mIRS-1  $\Delta$ SAR mutant (green). Scale bar, 10  $\mu$ m. **h** Confocal images of representative C2C12 cells co-expressing GFP-mIRS-1-TDP-43 mutant (green) and mCherry-p85 (red) or mCherry-Grb2. Scale bar, 10  $\mu$ m. **i** GFP-tagged mIRS-1 wildtype or mutants were immunoprecipitated in IGF-1-stimulated or control C2C12-IRS-1 KO/GFP-mIRS-1, C2C12-IRS-1 KO/GFP-mIRS-1  $\Delta$ SAR or C2C12-IRS-1 KO/GFP-mIRS-1 9YA cell lines and then subjected to Western blot with p-mIRS-1 Y608 antibodies. Data in the bar graphs represent the mean  $\pm$  SEM values of the ratios of densities for three independent experiments. \*\*\*\*:  $p < 0.0001$ . ns: not significant. **j** Immunoblot analysis of total and phosphorylated AKT and ERK levels in C2C12-IRS1 KO, C2C12-IRS1 KO/GFP-mIRS-1, C2C12-IRS1 KO/GFP-mIRS-1  $\Delta$ SAR or C2C12-IRS1 KO/GFP-mIRS-1-TDP-43 cell lines treated

with or without IGF-1 conditional medium for 2.5 min. Data in the bar graphs represent the mean  $\pm$  SEM values of the ratios of densities for three independent experiments. \*\*:  $p < 0.01$ . \*\*\*:  $p < 0.001$ . \*\*\*\*:  $p < 0.0001$ . ns: not significant. **k** Confocal images of endogenous FoxO1 in the starved or IGF-1-stimulated indicated cell lines. Data in the bar graphs represent the mean  $\pm$  SEM values ( $n=50$ ). \*\*\*\*:  $p < 0.0001$ . Scale bar, 10  $\mu\text{m}$ .

Sup. Fig. 6

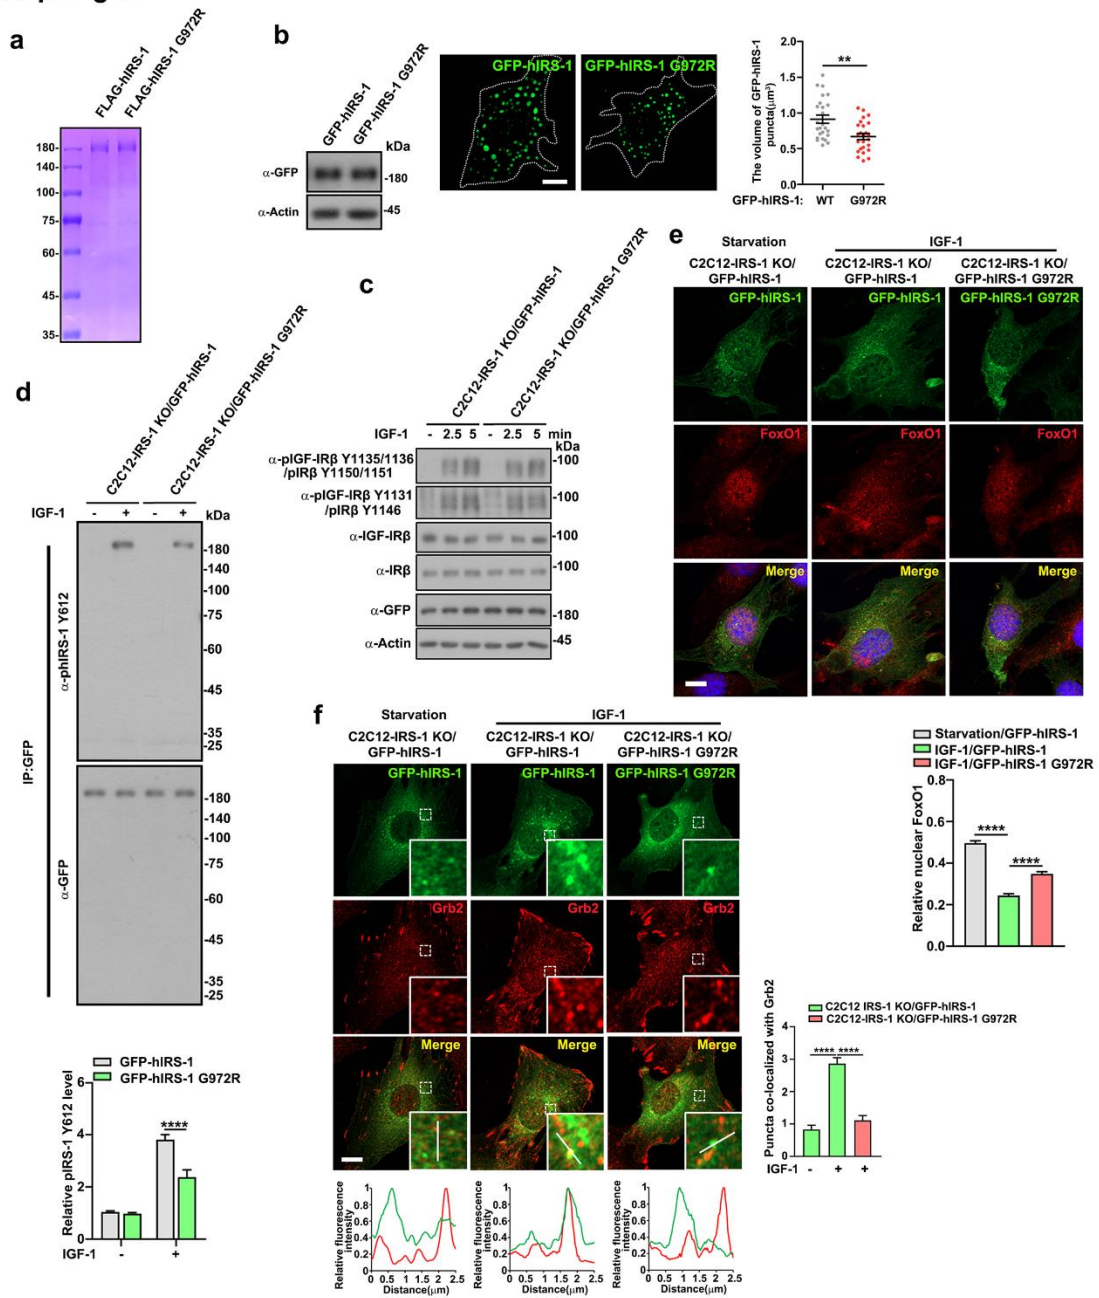

**Fig. S6. The metabolic disease-related hIRS-1 G972R mutant undergoes altered phase transition.** **a** SDS-PAGE and Coomassie blue staining results of purified recombinant FLAG-hIRS-1 and FLAG-hIRS-1 G972R proteins. **b** Confocal images of representative C2C12 myoblasts expressing GFP-hIRS-1 or GFP-hIRS-1 G972R mutant. Scale bar, 10  $\mu$ m. Western blot analysis displaying the GFP-hIRS-1 and GFP-hIRS-1 G972R mutants as expressed at a similar level. Quantitative analysis of volume of GFP-hIRS-1 and GFP-hIRS-1 G972R mutant puncta is shown (n=26). \*\*: p<0.01. **c** Immunoblot analysis of the indicated pIGF-1R $\beta$  and pIR $\beta$  tyrosine phosphorylation levels in C2C12-IRS-1 KO/GFP-hIRS-1 and C2C12-IRS-1 KO/GFP-hIRS-1 G972R cell lines. **d** GFP-tagged hIRS-1 wildtype or mutants were immunoprecipitated in IGF-1-stimulated or control C2C12-IRS-1 KO/GFP-hIRS-1 and C2C12-IRS-1 KO/GFP-hIRS-1 G972R cell lines and then subjected to Western blot with p-hIRS-1 Y608 antibodies. Data in the bar graphs represent the mean  $\pm$  SEM values of the ratios of densities for three independent experiments. \*\*\*\*: p<0.0001. **e** Confocal images of endogenous FoxO1 in the starved or IGF-1-stimulated C2C12-IRS-1 KO/GFP-hIRS-1 and C2C12-IRS-1 KO/GFP-hIRS-1 G972R cell lines. Data in the bar graphs represent the mean  $\pm$  SEM values (n=46). \*\*\*\*: p<0.0001. Scale bar, 10  $\mu$ m. **f** Confocal images of endogenous Grb2 and GFP-hIRS-1 or GFP-hIRS-1 G972R in the starved or IGF-1-stimulated C2C12-IRS-1 KO/GFP-hIRS-1 and C2C12-IRS-1 KO/GFP-hIRS-1 G972R cell lines. Scale bar, 10  $\mu$ m. Line scans show the relative intensity profiles of hIRS-1 with Grb2. The GFP-hIRS-1 puncta co-localized with Grb2 were quantified (n=36). Data in the bar graphs represent the mean  $\pm$  SEM. \*\*\*\*: p<0.0001.

**Table S1: Plasmid information**

| <b>Recombinant DNA</b>                  | <b>Vector backbones</b>        | <b>Restriction enzyme cutting site</b> |
|-----------------------------------------|--------------------------------|----------------------------------------|
| FLAG-mIRS-1                             | pXJ40-FLAG                     | Hind III and Not I                     |
| FLAG-mIRS-1 1-300 (PH-PTB)              | pXJ40-FLAG                     | BamH I and Xma I                       |
| FLAG-mIRS-1 301-600                     | pXJ40-FLAG                     | BamH I and Xma I                       |
| FLAG-mIRS-1 601-800                     | pXJ40-FLAG                     | Hind III and Not I                     |
| FLAG-mIRS-1 801-1000                    | pXJ40-FLAG I                   | Hind III and Not I                     |
| FLAG-mIRS-1 1001-1233                   | pXJ40-FLAG                     | Hind III and Not I                     |
| FLAG-hIRS-1                             | pXJ40-FLAG                     | Hind III and Not I                     |
| FLAG-hIRS-1 G972R                       | pXJ40-FLAG                     | Hind III and Not I                     |
| GFP-mIRS-1                              | pXJ40-GFP                      | Hind III and Not I                     |
| GFP-mIRS-1 131-1233                     | pXJ40-GFP                      | Hind III and Not I                     |
| GFP-mIRS-1 301-1233 (IDR)               | pXJ40-GFP                      | Hind III and Not I                     |
| GFP-mIRS-1 401-1233                     | pXJ40-GFP                      | Hind III and Not I                     |
| GFP-mIRS-1 501-1233                     | pXJ40-GFP                      | Hind III and Not I                     |
| GFP-mIRS-1 601-1233                     | pXJ40-GFP                      | Hind III and Not I                     |
| GFP-mIRS-1 701-1233                     | pXJ40-GFP                      | Hind III and Not I                     |
| GFP-mIRS-1 801-1233                     | pXJ40-GFP                      | Hind III and Not I                     |
| GFP-mIRS-1 1001-1233                    | pXJ40-GFP                      | Hind III and Not I                     |
| GFP-mIRS-1 $\Delta$ 300-600 (SAR)       | pXJ40-GFP                      | Hind III and Not I                     |
| GFP-mIRS-1 $\Delta$ 600-800             | pXJ40-GFP                      | Hind III and Not I                     |
| GFP-mIRS-1 $\Delta$ 800-1000            | pXJ40-GFP                      | Hind III and Not I                     |
| GFP-mIRS-1 $\Delta$ 1001-1233           | pXJ40-GFP                      | Hind III and Not I                     |
| GFP-mIRS-1 9YA                          | pXJ40-GFP                      | Hind III and Not I                     |
| GFP-hIRS-1                              | pXJ40-GFP                      | Hind III and Not I                     |
| GFP-hIRS-1 G972R                        | pXJ40-GFP                      | Hind III and Not I                     |
| mCherry-p85                             | pXJ40-mCherry                  | BamH I and Xma I                       |
| mCherry-Grb2                            | pXJ40-mCherry                  | BamH I and Xma I                       |
| RFP-Rab5                                | pXJ40-RFP                      | BamH I and Xho I                       |
| HP138-GFP-mIRS-1                        | HP138-puro<br>(Addgene:134246) | N/A                                    |
| HP138-GFP-mIRS-1 $\Delta$ 300-600 (SAR) | HP138-puro                     | N/A                                    |
| HP138-GFP-mIRS-1 9YA                    | HP138-puro                     | N/A                                    |
| HP138-GFP-hIRS-1                        | HP138-puro                     | N/A                                    |
| HP138-GFP-hIRS-1 G972R                  | HP138-puro                     | N/A                                    |
| HP138-GFP-mIRS-1 $\Delta$ 600-800       | HP138-puro                     | N/A                                    |
| HP138-GFP-mIRS-1 $\Delta$ 800-1000      | HP138-puro                     | N/A                                    |
| HP138-GFP-mIRS-1 $\Delta$ 1001-1233     | HP138-puro                     | N/A                                    |



|                    |               |        |
|--------------------|---------------|--------|
| HP138- mCherry-p85 | HP138-puro    | N/A    |
| lentiCRISPRv2-gRNA | lentiCRISPRv2 | BsmB I |
